# Supplementary material for: RNA interference-mediated downregulation of phospholipid scramblase 1 expression in primary liver cancer in vitro
Source: PubMed Central journal article supplement — Oncol Lett. 2020 Oct 14;20(6):361. doi: 10.3892/ol.2020.12225 (PMC7590428; doi:10.3892/ol.2020.12225), 2020-10-14

Figure S1. Quantification of wound healing assay. The area of the gap was measured with Image J software and % closure was calculated as area at 48 h/area at 0 h x100. \*\*\*P<0.001.

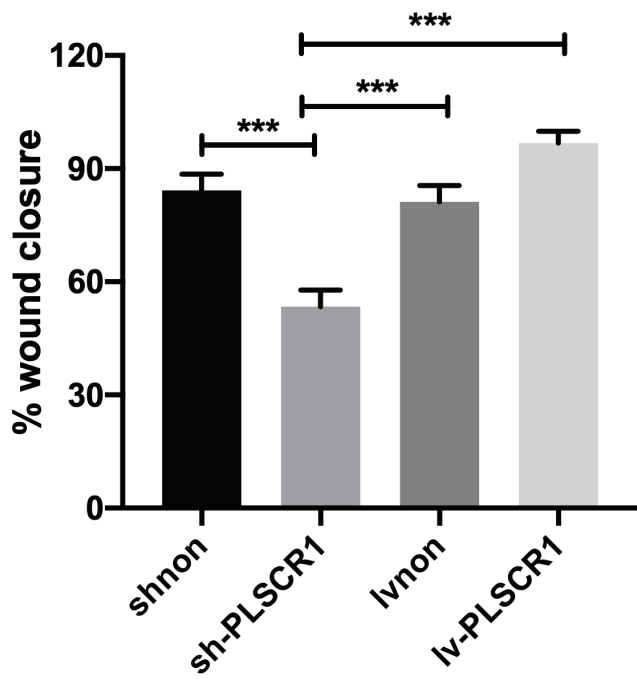

Supplement: Supplementary_Data.pdf [file Supplementary_Data.pdf]
